# Supplementary material
Source: Research Square preprint supplement (doi:10.21203/rs.3.rs-8929917/v1)

**Supplemental figures**

**Figure. S1.**


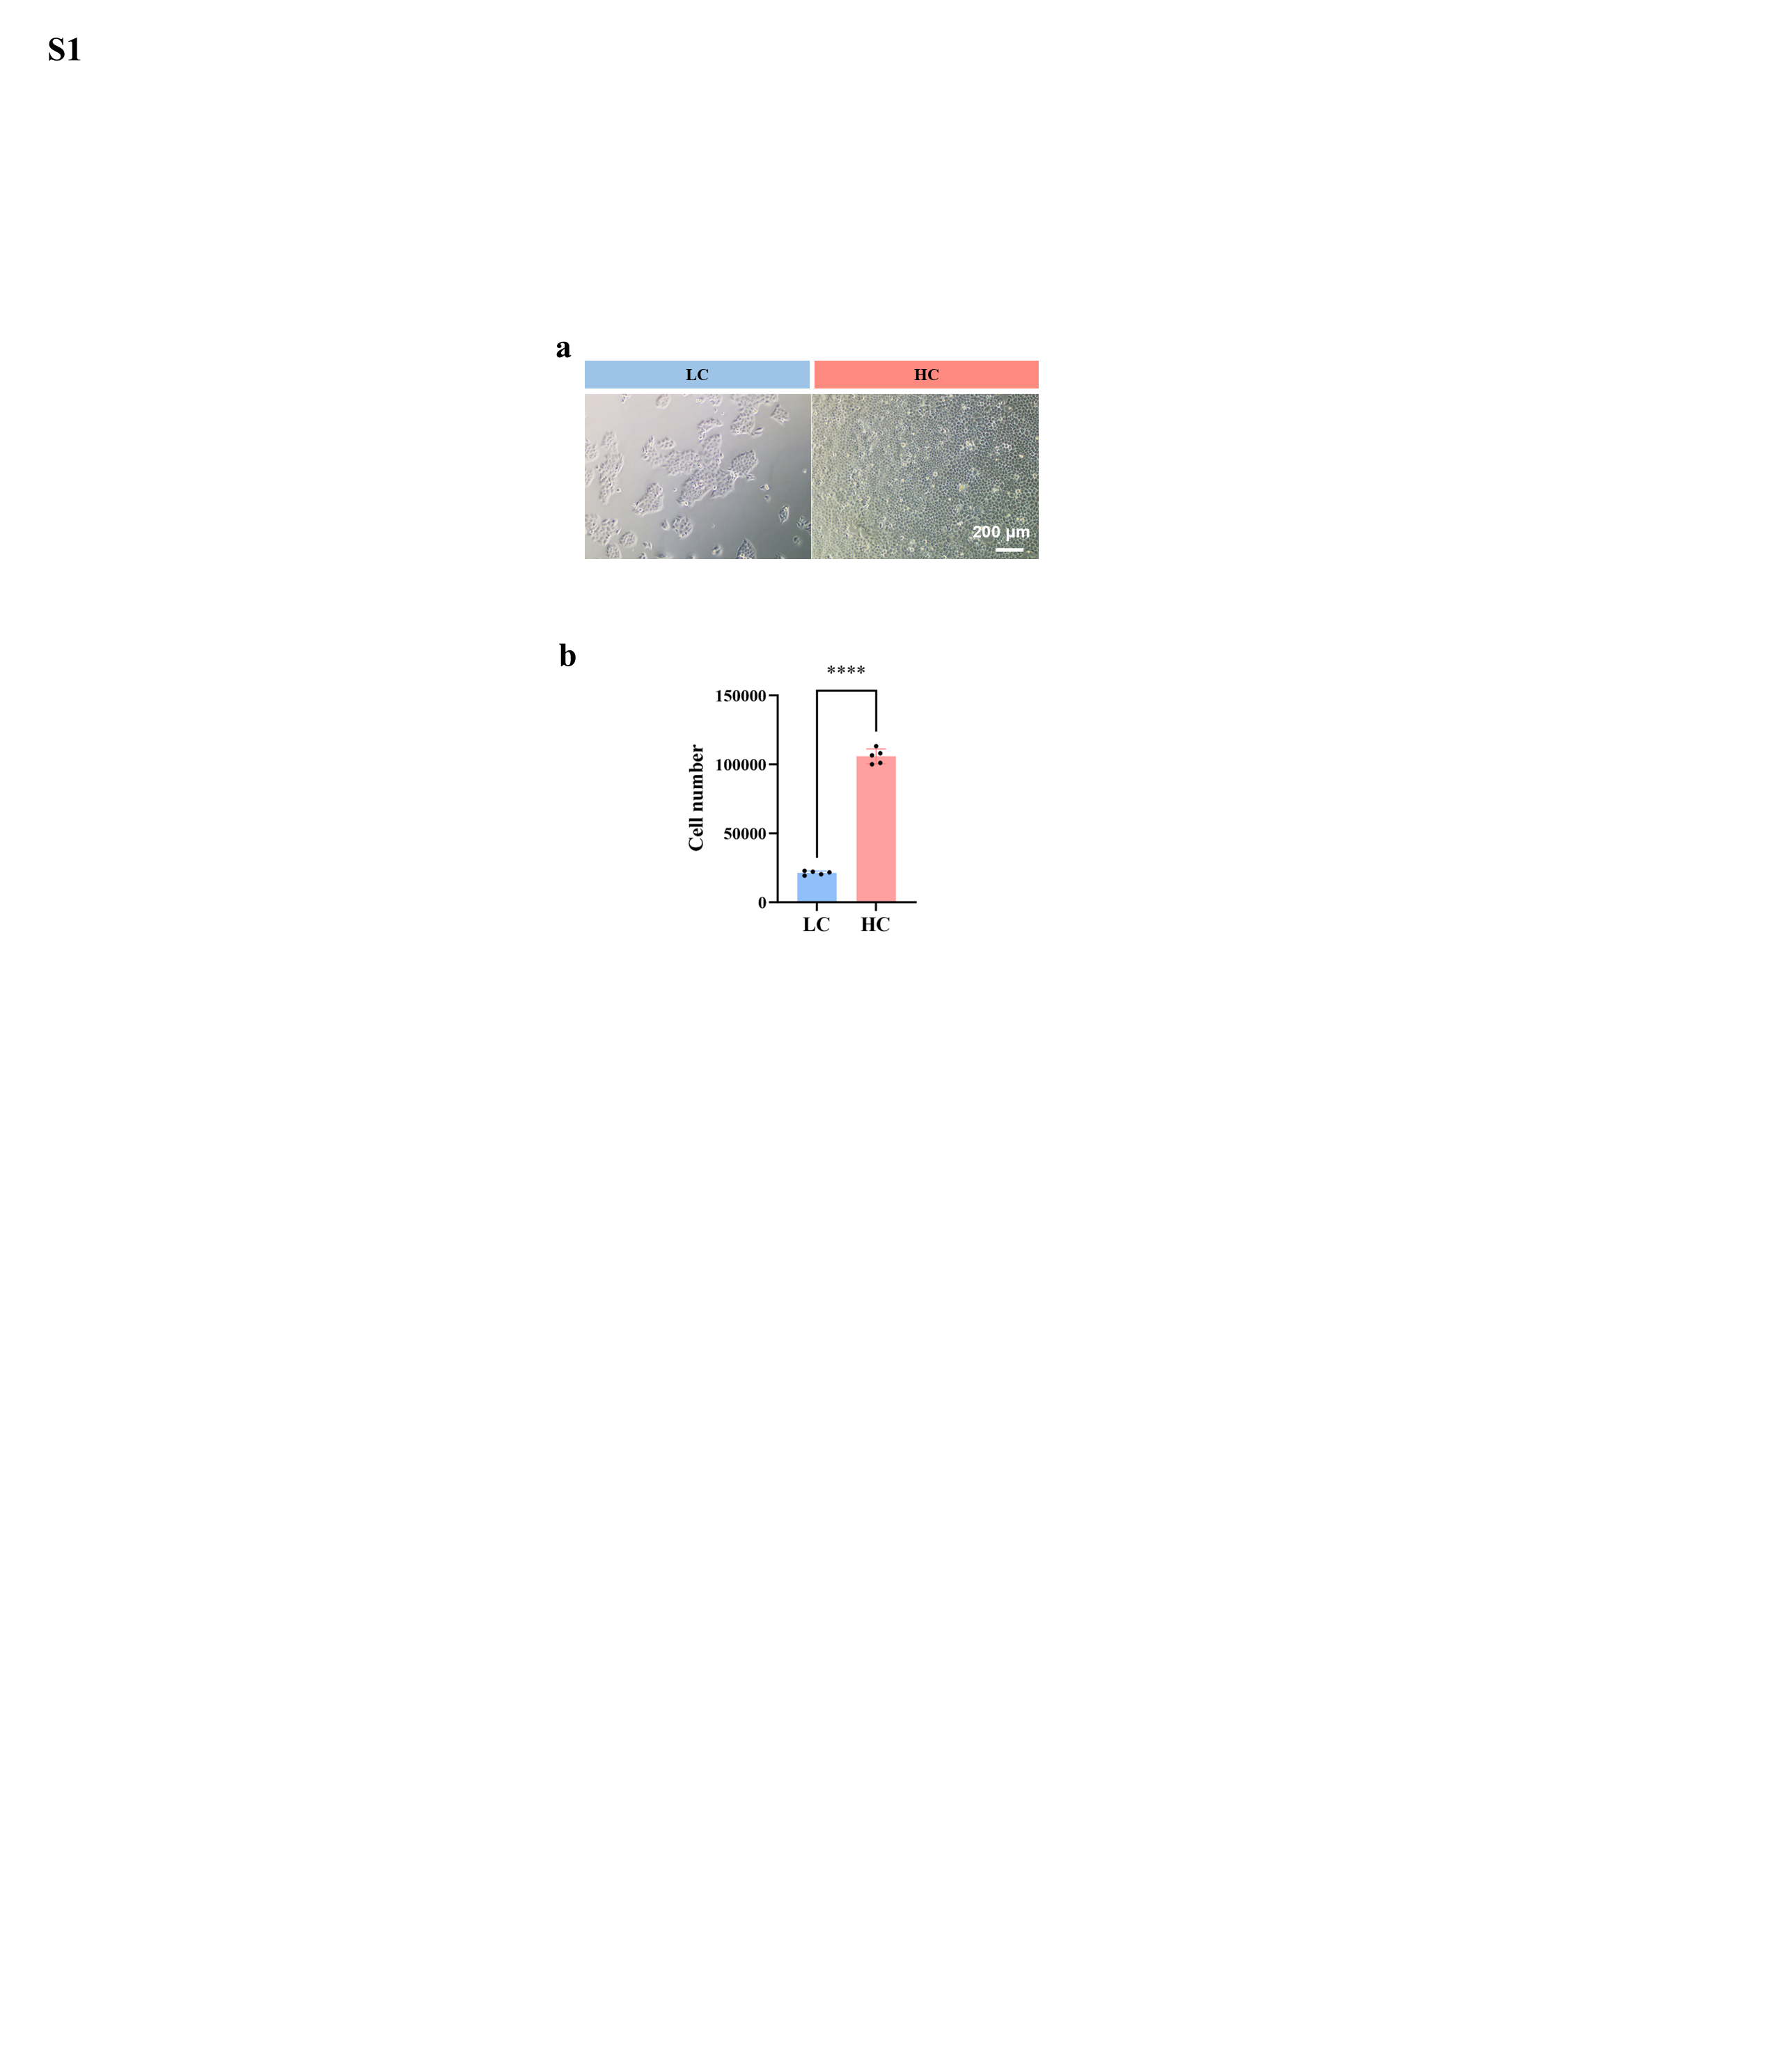


**Figure S1. Characterization of the 2D crowding model.** **(a)** Phase-contrast image of the established low-density control (LC) and high-density crowded (HC) monolayer. (**b**) Quantification of cell numbers in the HC and LC groups. Data represents mean ± SEM. ****p < 0.0001.

**Figure. S2.**

**
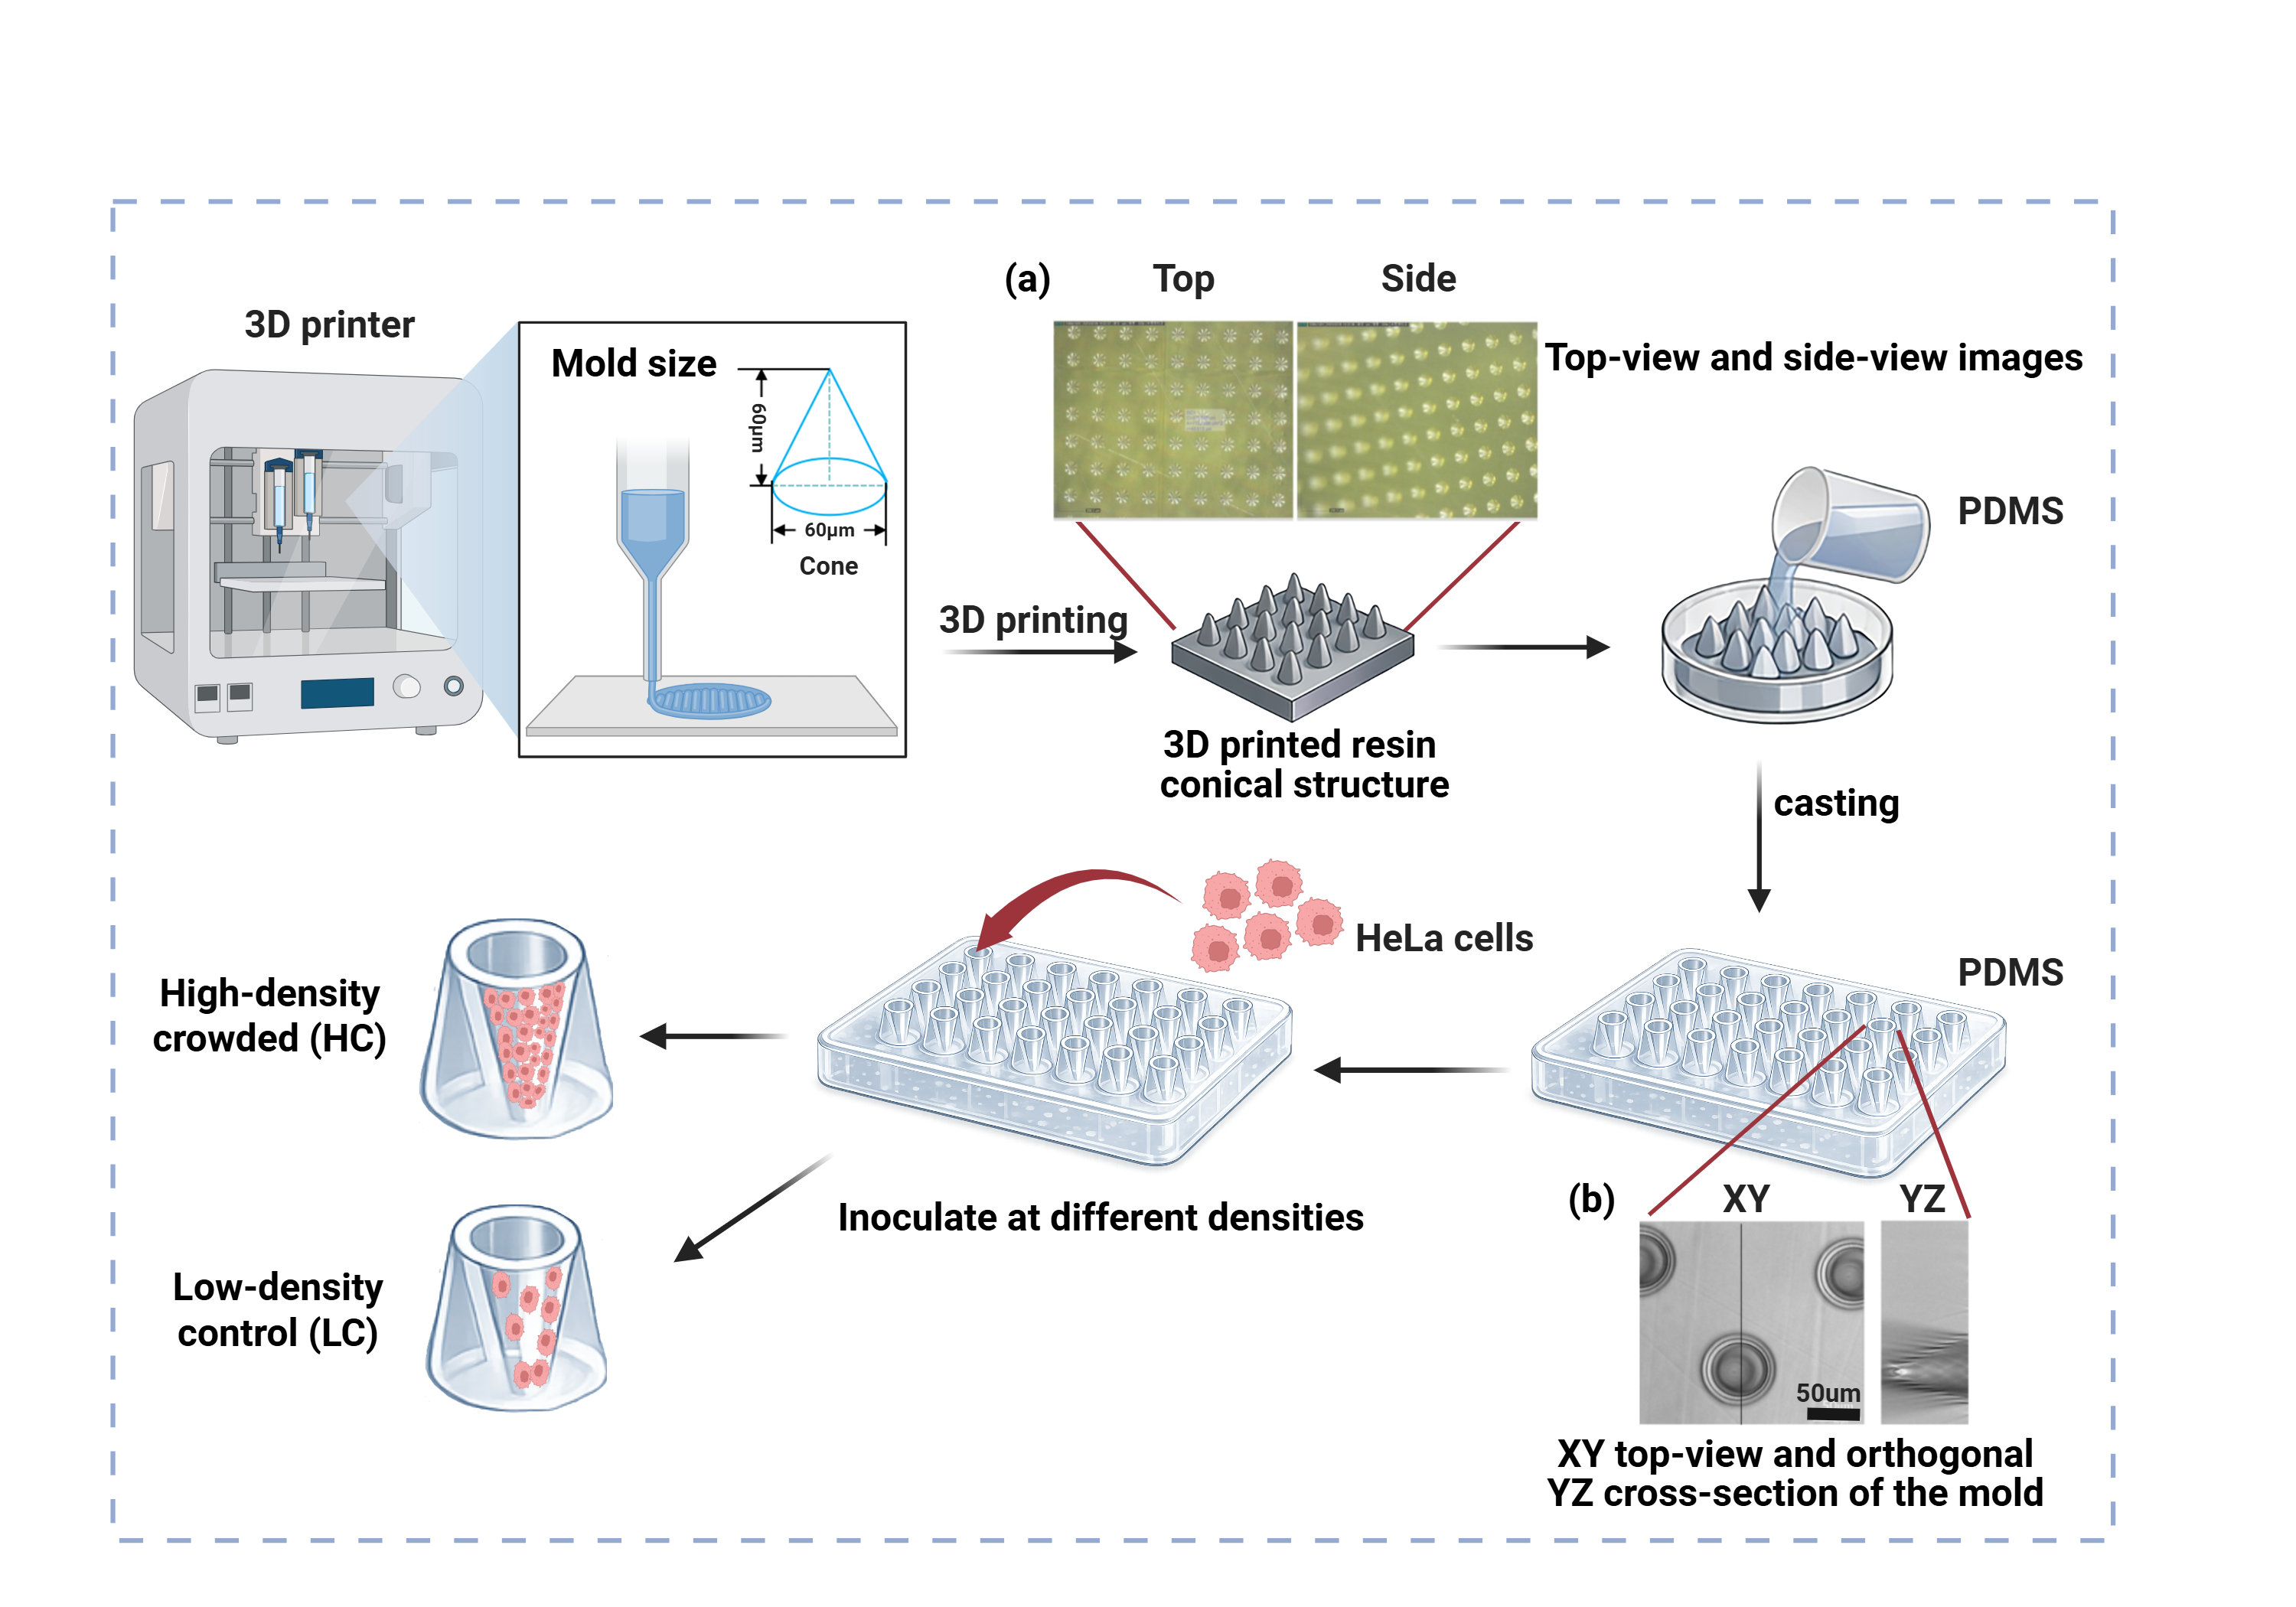
**

**Figure S2. Design and fabrication of a 3D conical culture mold.** According to schematic of the conical mold design, the mold featuring a periodic array of conical structures was designed and fabricated via 3D printing. (a) Top-view and side-view images showing a periodic array of uniform conical structures. Polydimethylsiloxane (PDMS) was slowly poured onto the 3D-printed master. PDMS negatives were carefully peeled from the masters to yield free-standing conical molds. (b) XY top-view and orthogonal YZ cross-section of the mold, confirming the faithful reproduction of the intended tapered geometry and surface precision.

**Figure. S3.**


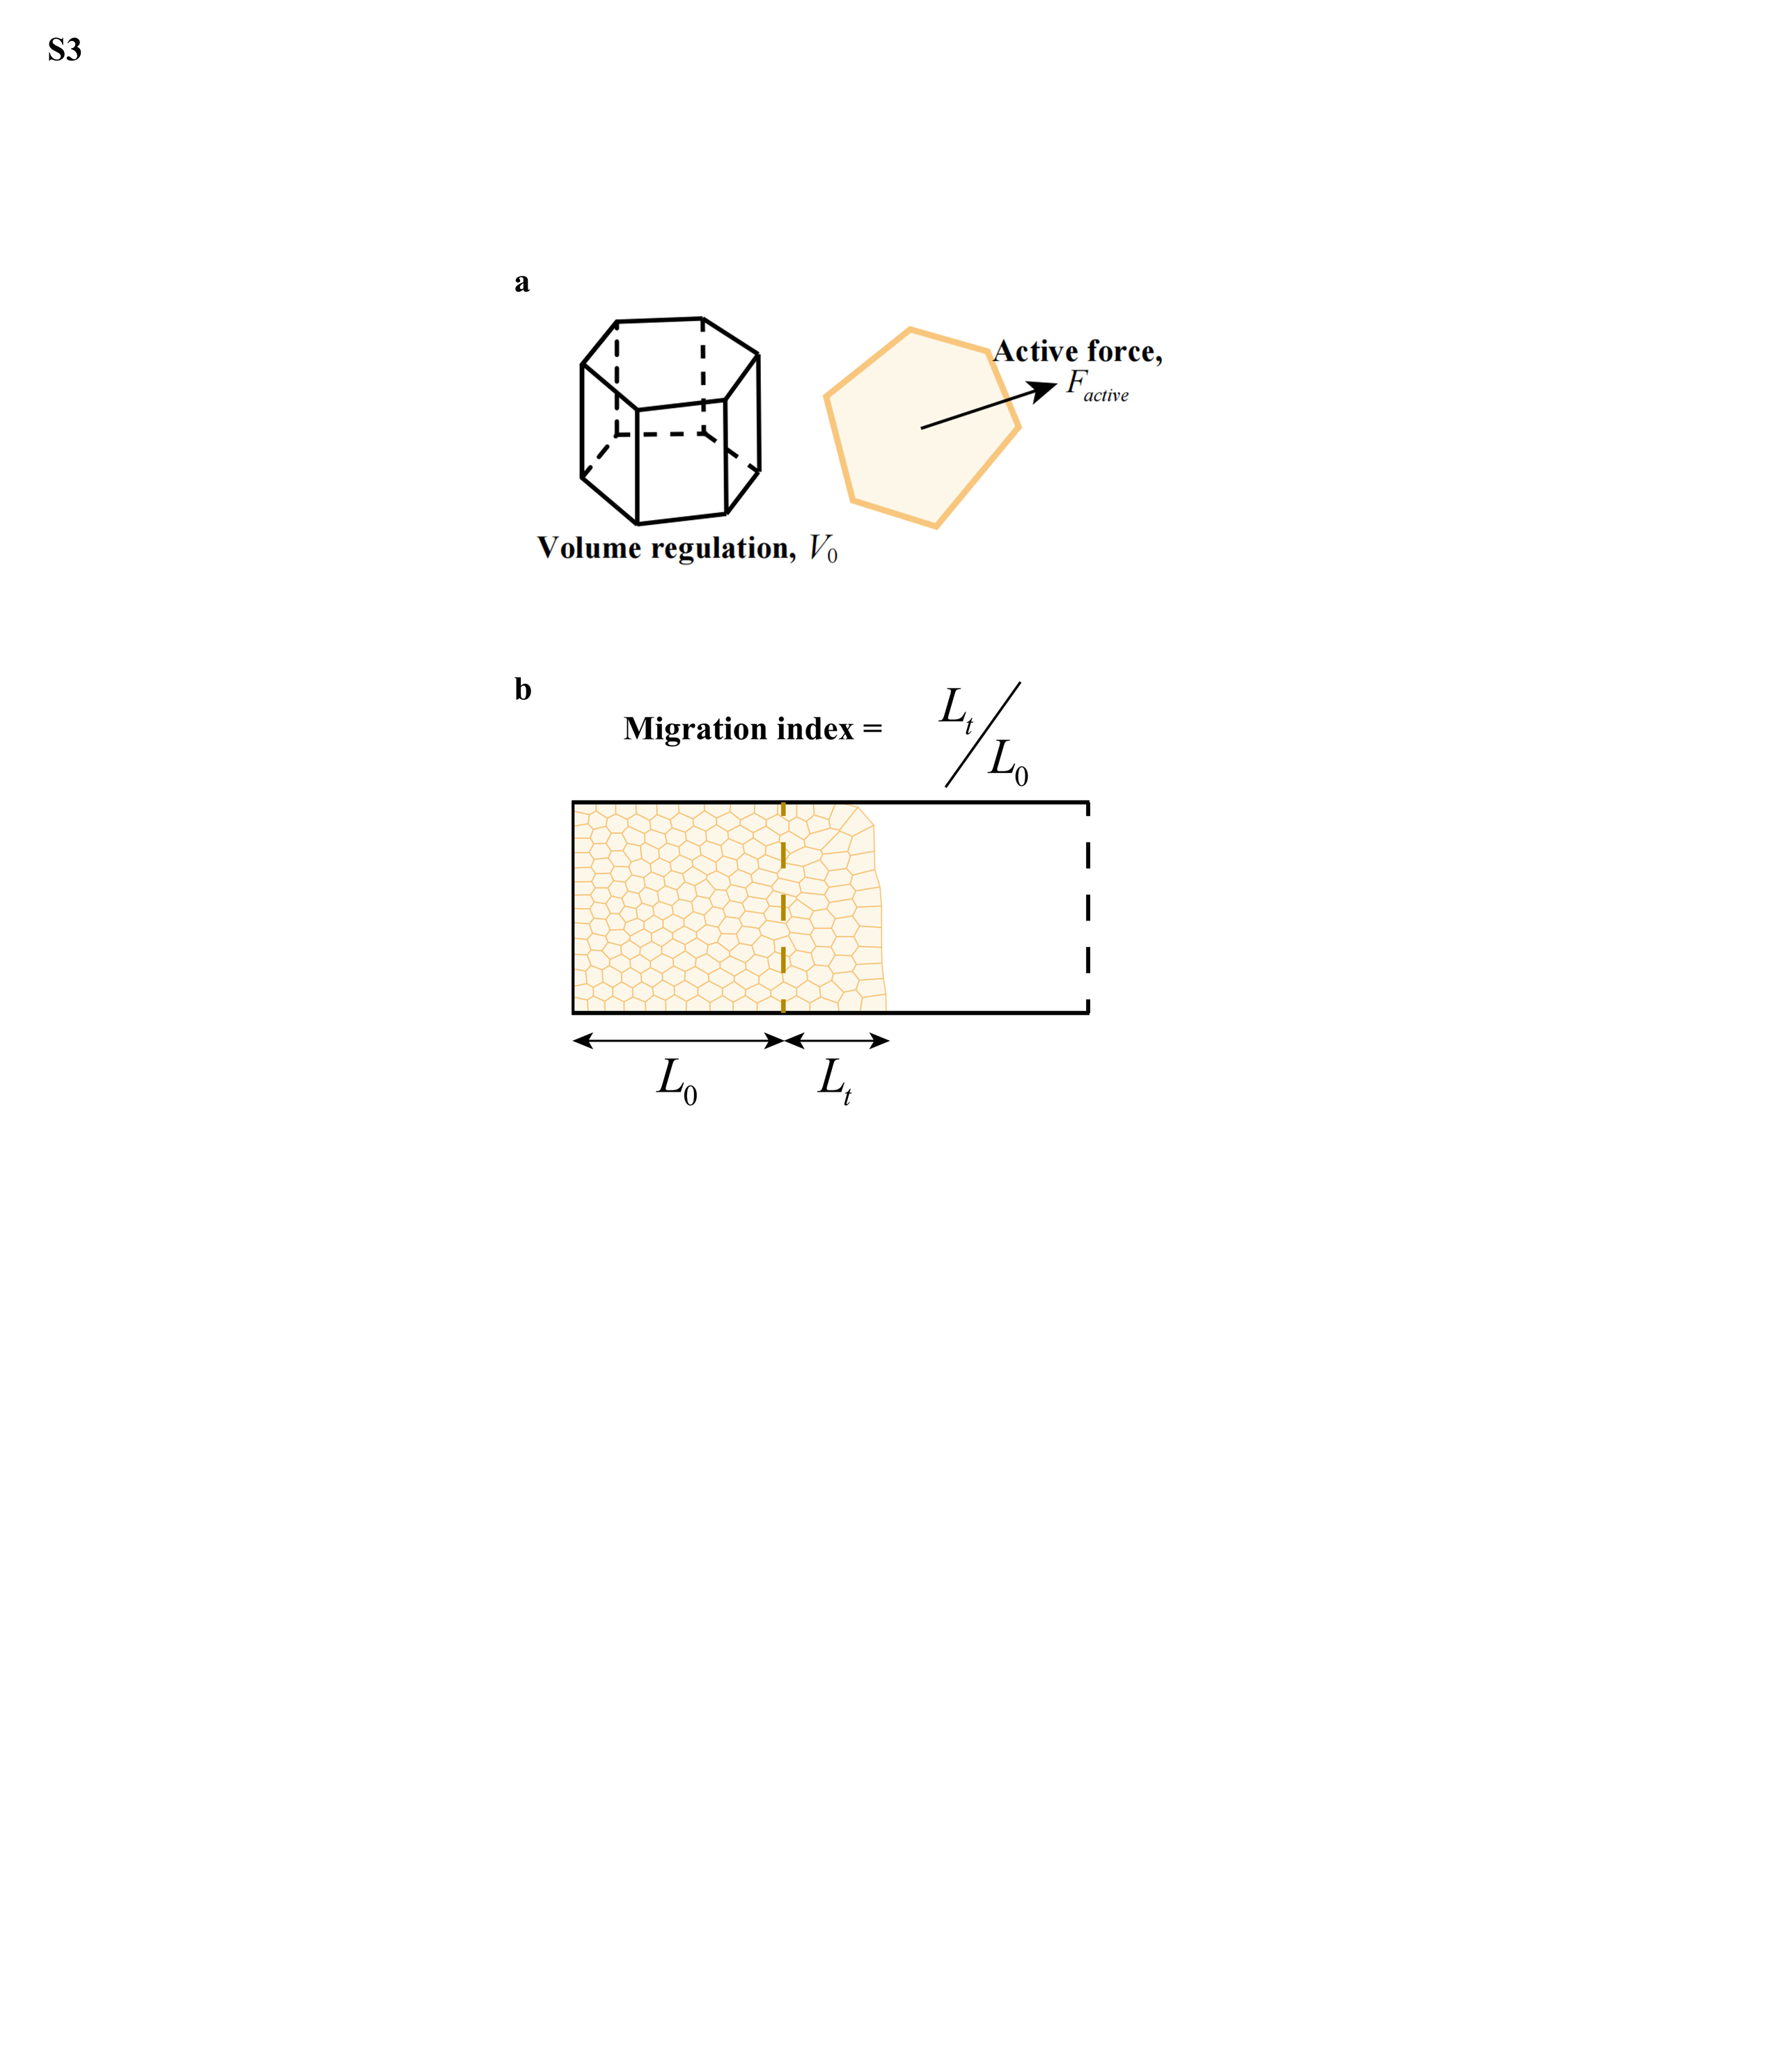


**Figure S3. Simulation for cell migration under different osmotic conditions.** (**a**) Geometrical features of a cell undergoing migration driven by a polarized active force *Factive*. *Ai* and *Ali* are the basal surface areas for cell-substrate and cell-cell adhesion. *Hi* and *Pi* are the instantaneous cell height and basal perimeter. (**b**) Definition of the migration index.

**Figure. S4.**


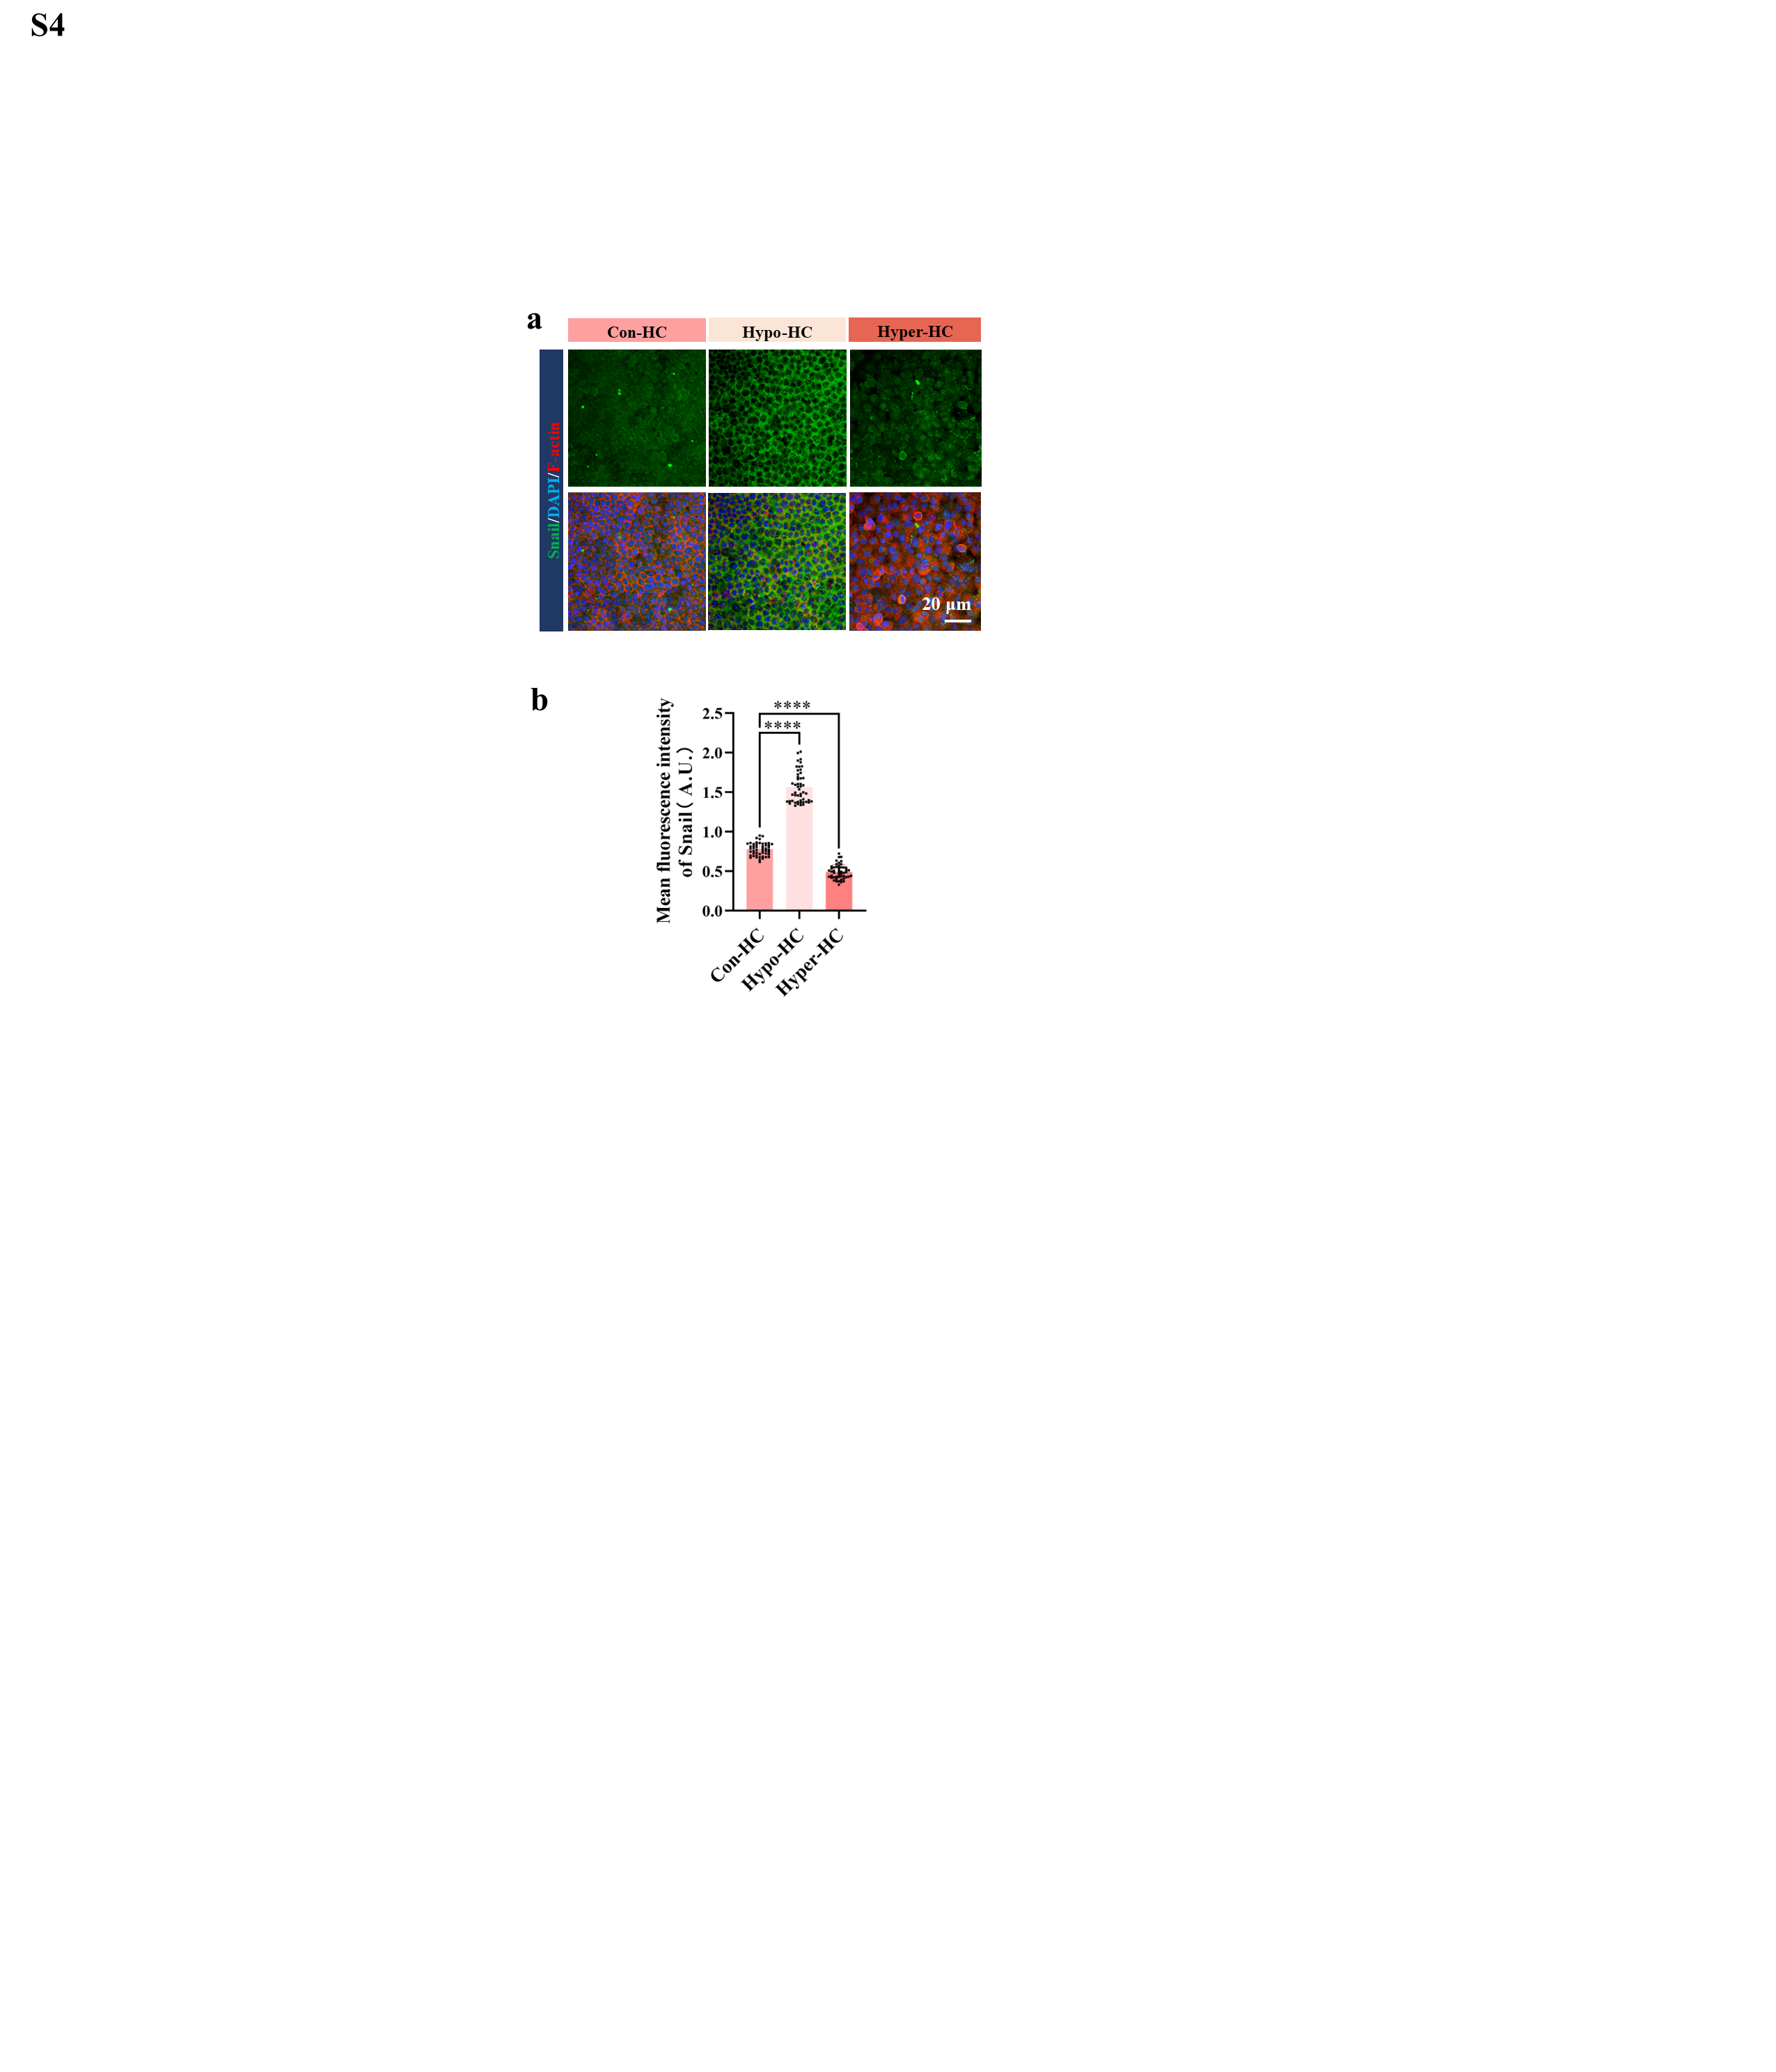


**Figure S4. ΔP regulates snail expression in HeLa cells. (a)** Representative confocal images of snail in crowded HeLa cells cultured under Con, Hypo, and Hyper conditions. (**b**) Quantification of snail fluorescence intensity normalized to the control. Data represents mean ± SEM. ****p < 0.0001.


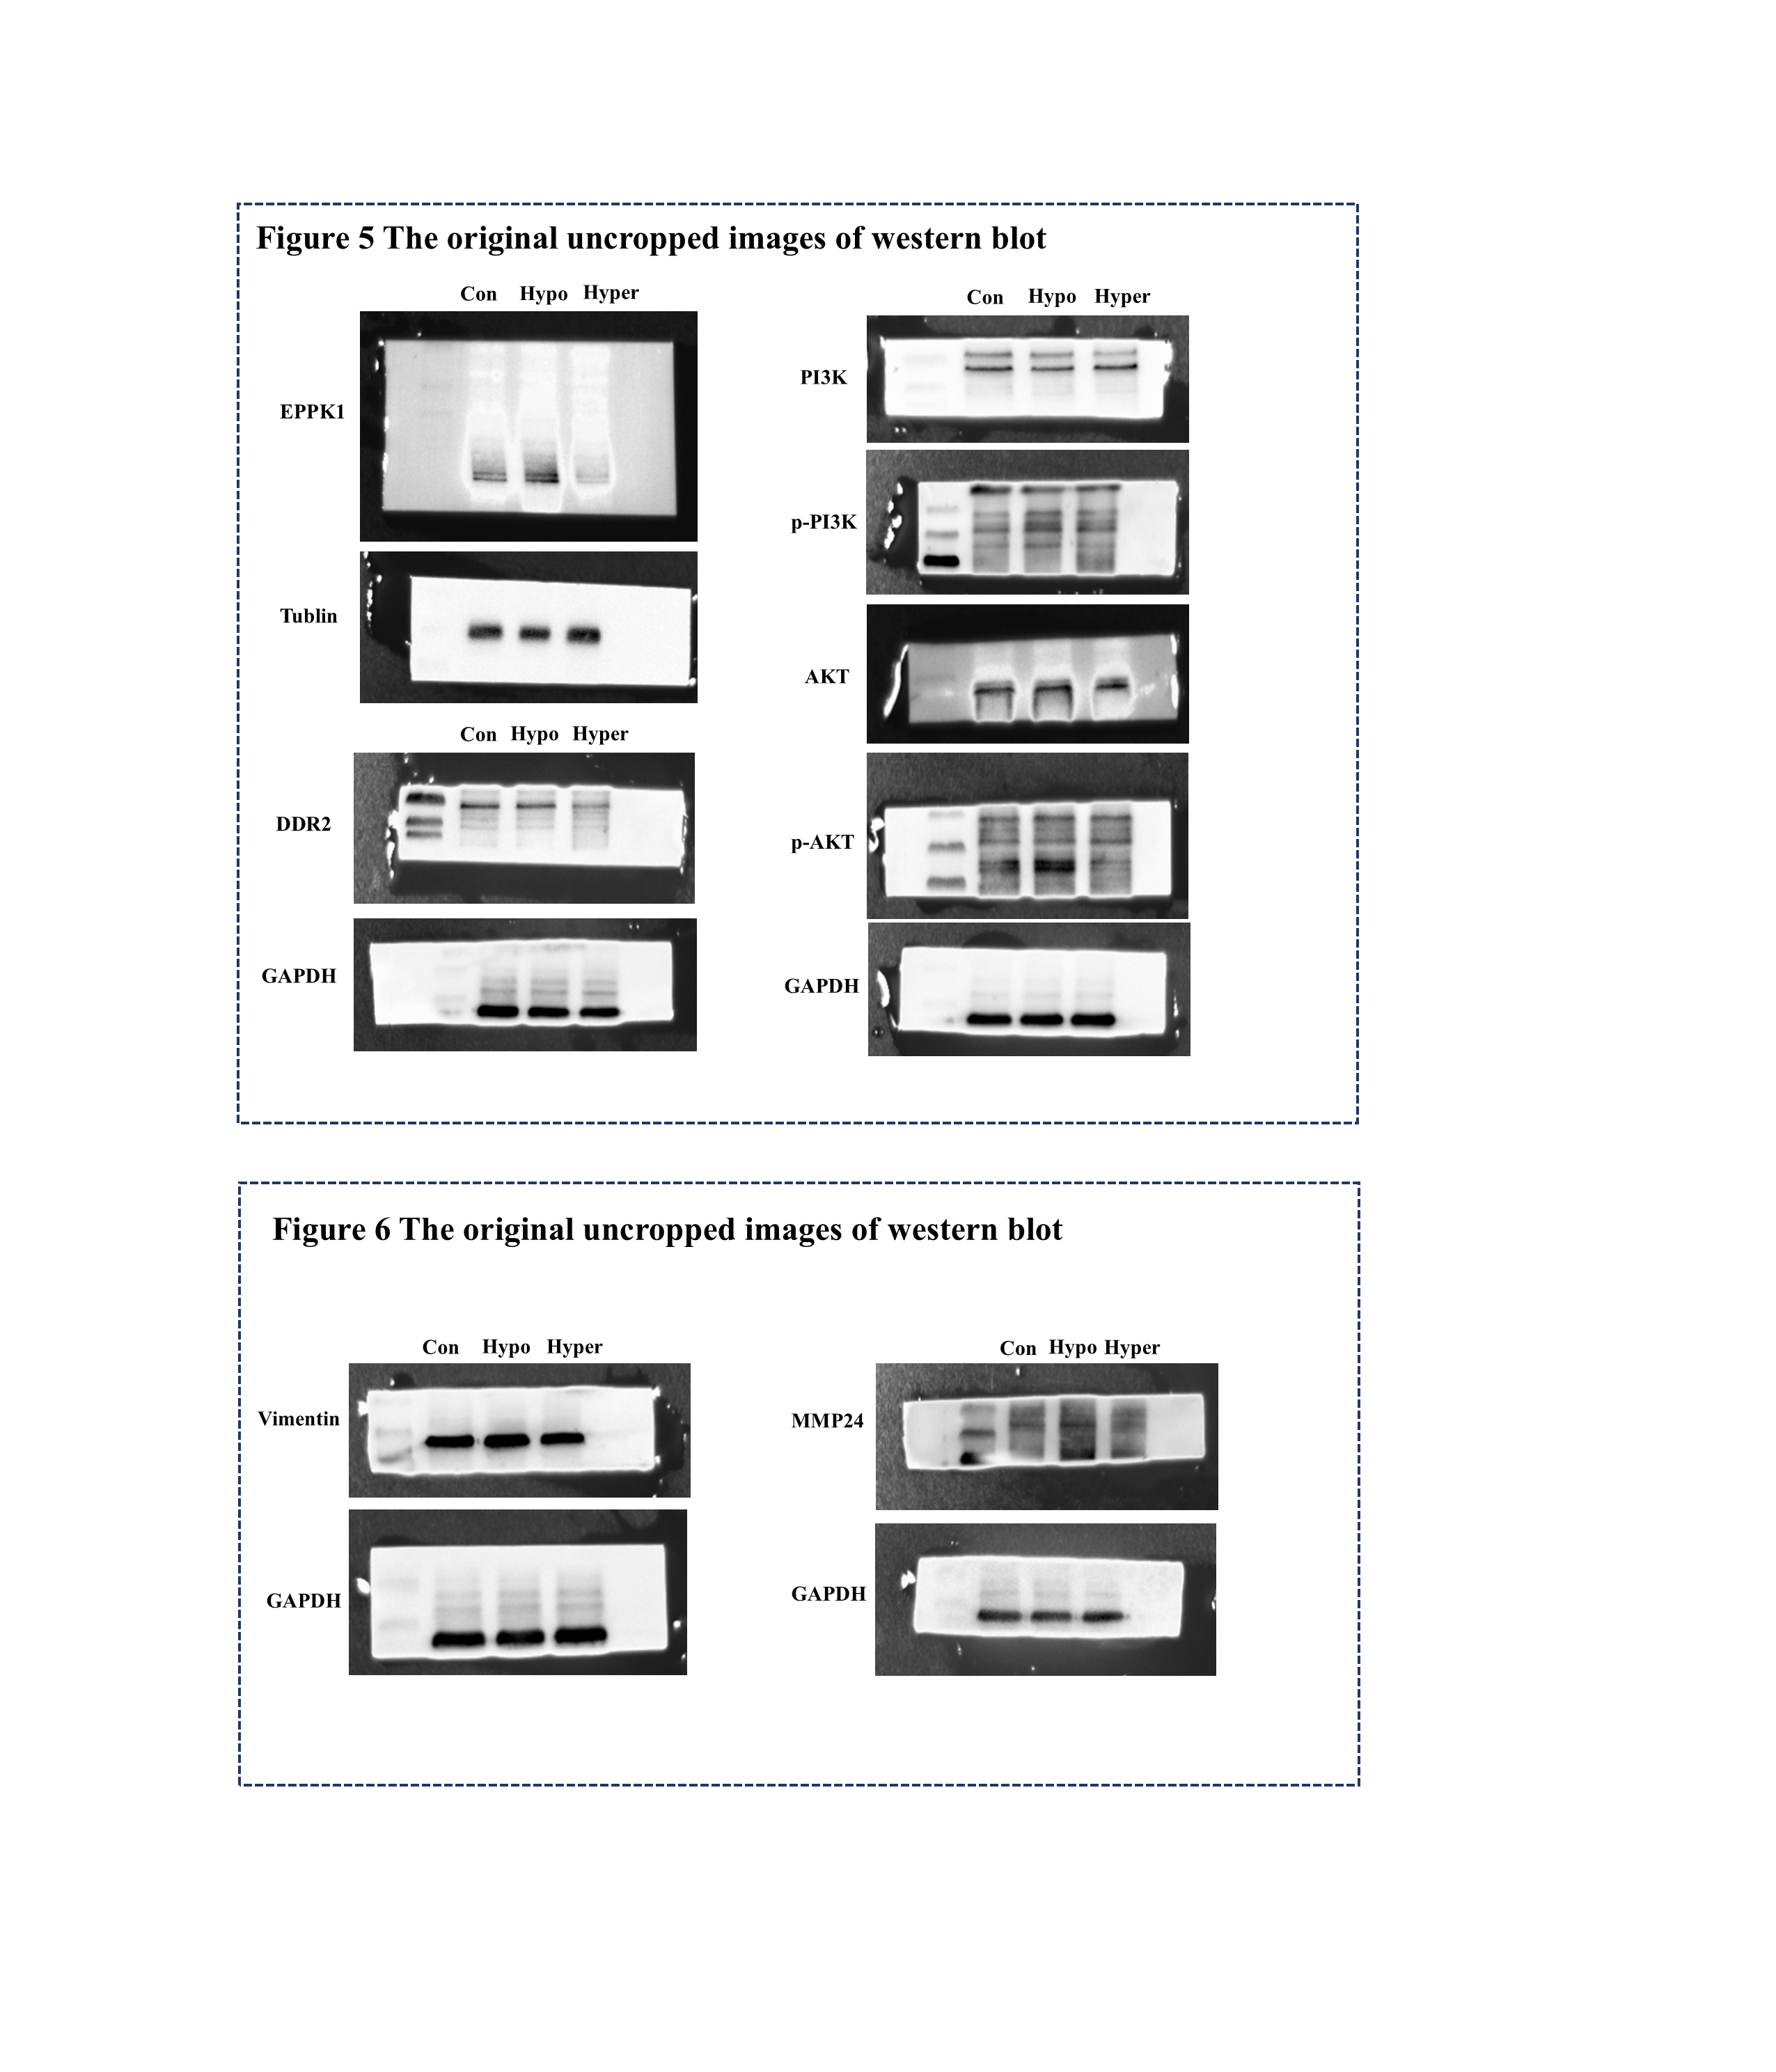

Supplement: Supplementary file 1 [file b958d2d26312a4bfb70cae69.docx]
