# Supplementary material
Source: Research Square preprint supplement (doi:10.21203/rs.3.rs-8929917/v1)
Supplement: Supplementary file 2 [file f8d9ecf831f1c698691dfcbf.docx]

**Method**

We employed a three-dimensional vertex model to simulate collective cell migration during a scratch-wound assay. In this model, each cell is represented as a right prism with apical and basal faces sharing identical polygonal geometry, while cell height is allowed to vary dynamically. The mechanical state of the cell system under studies is described by an energy functional

(1)

The four terms on the right-hand side of this equation describe contributions from cell volume elasticity, cell surface elasticity, cell-substrate adhesion, and cell-cell adhesion, respectively. Here, *Vi* and *V*0 denote the instantaneous and preferred (target) volume of cell *i*, respectively. The coefficient *K* governs the stiffness associated with volume changes, reflecting the resistance of the cell to compression or expansion. *Si* and *S*0 are the instantaneous and preferred surface areas of cell *i*, including apical, basal, and lateral faces. *B* represents the effective cortical tension of the cell membrane and actomyosin cortex. *Ai* and *Ali* are the basal surface areas for cell-substrate and cell-cell adhesion, with Λ and Γ representing the corresponding adhesive energy densities. According to the geometric relations of the cells treated as right prisms, we have *Vi* = *Ai* *Hi*, *Si* = 2*Ai* + *Pi Hi*, *S*0 = 2*A*0 + *P*0 *H*0 and *Ali* = *Pi Hi*, where *Hi* and *Pi* are the instantaneous cell height and basal perimeter, respectively, while *H*0 and *P*0 represent the corresponding preferred quantities. In addition, *A*0 is the preferred basal surface area. The energy functional in Equation (1) can be rewritten as

(2)

Cell deformation is determined by the in-plane vertex coordinates and the cell height. The in-plane vertex dynamics are governed by

(3)

where **r** denotes the in-plane coordinates of each vertex, *η* is the viscous coefficient. The cellular active force of each cell is characterized by

with *θi* being the angle between active force and the *x*-axis. The polarized active-force direction *θi* of the *i*-th cell evolves according to , where *ξi* is Gaussian white noise with zero mean, , and correlation . Here, *Dr* is the rotational diffusion coefficient, and denote the Dirac and Kronecker delta functions, respectively.

The dynamics of cell height are governed by

(4)

In our study, all system parameters are nondimensionalized using cell area *A*0 , cortical tension *B* andviscous coefficient *η* as reference scales. Specifically, the energy is scaled by, length by, time by, force by.

Due to the symmetry, we only simulated the migration of cells on the left side of the scratch. Cells were initially confined to a defined region. Once the simulation began, confinement was removed, allowing the cells to migrate into the empty space.

The effects of osmotic pressure were incorporated in two ways. On the one hand, the preferred cell volume *V*0 was adjusted in response to the osmotic shocks. In our simulations, the normalized preferred cell volume was set to 2.0, 3.5 and 5.0 for hypertonic, isotonic, hypotonic conditions, respectively. On the other hand, in view of observed variation in invadopodia number under different osmotic conditions in Figure 2i, we assumed that the active force *F*active varies accordingly. Specifically, the normalized active force was set to 0.03, 0.06, and 0.09 for hypertonic, isotonic, hypotonic conditions, respectively. Other normalized parameters are set as, , , ,. Here, to quantitatively describe the cellular migration under different osmotic conditions, we employed a migration index, defined as the ratio of the front-edge trajectory length to the initial length of the migrating cell population.
